# Supplementary material
Source: MDPI journal article supplement (https://www.mdpi.com/2227-7390/10/17/3164)
Supplement: s1 [file s1]

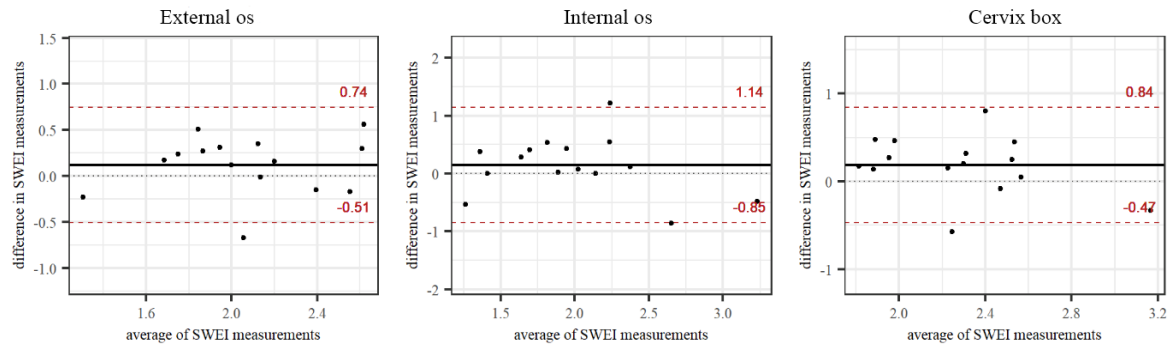

Figure S1: Bland-Altman plots of the values of SWE in three considered cervical regions for operator 1.

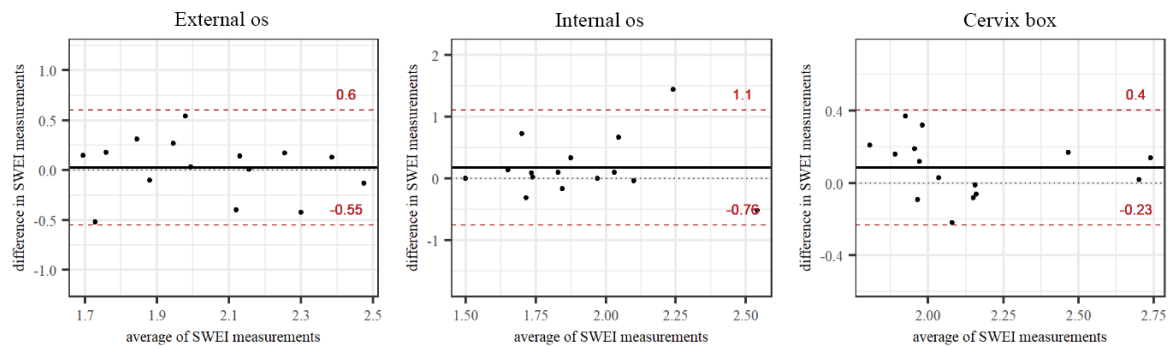

Figure S2: Bland-Altman plots of the values of SWE in three considered cervical regions for operator 2.

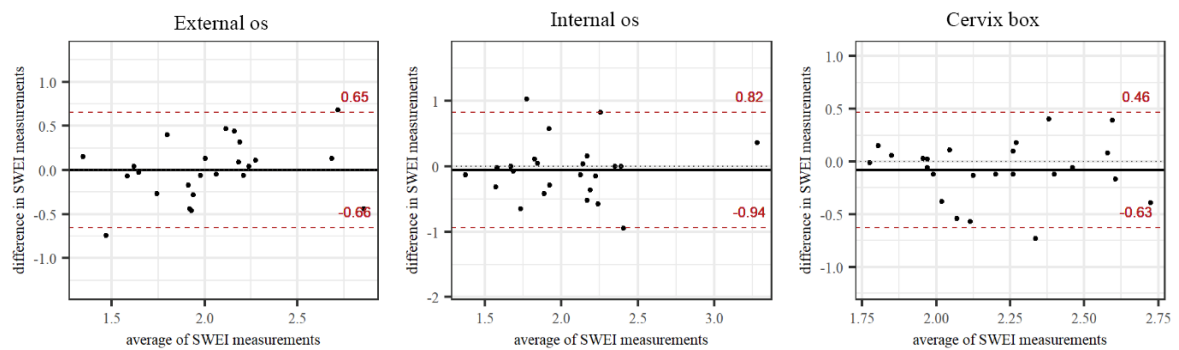

Figure S3: Bland-Altman plots of the values of SWE in three considered cervical regions for operator 3.
