# Supplementary material
Source: MDPI journal article supplement (https://www.mdpi.com/2227-7390/10/17/3164)
Supplement: s1 [file s1]

Archive with 1 entries (1 files):
- mathematics-1865910-supplementary.pdf
